# Supplementary material for: EKTOPİK GEBELİK VE NORMAL GEBELİKTE KAN KREATİN KİNAZ DÜZEYLERİNİN KARŞILAŞTIRILMASI
Source: Springer Nature journal article supplement (doi:10.1186/1471-2458-5-131), 2012-07-01
Supplement: Additional file 1 [file 1471-2458-5-131-s1.doc]

Additional File 1: National Estimates

| **Country** | **MMR** | **Period** | **Study Design** |
| --- | --- | --- | --- |
| **Eastern Africa** | | | |
| Comoros | 517 | 88-00 | Indirect sisterhood method |
| Eritrea | 998 | 86-95 | Direct sisterhood method |
| Ethiopia | 871 | 94-00 | Direct sisterhood method |
| Kenya | 414 | 93-03 | Direct sisterhood method |
| Madagascar | 488 | 90-97 | Direct sisterhood method |
| Malawi | 1120 | 94-00 | Direct sisterhood method |
| Mauritius | 24 | 98-00 | Cross-sectional |
| Rwanda | 1071 | 95-00 | Direct sisterhood method |
| Uganda | 505 | 96-01 | Direct sisterhood method |
| United Republic of Tanzania | 529 | 87-96 | Direct sisterhood method |
| Zambia | 729 | 95-02 | Indirect sisterhood method |
| Zimbabwe | 695 | 95-99 | Direct sisterhood method |
| **Middle Africa** | | | |
| Angola | 502 | 94-98 | Cross-sectional |
| Cameroon | 430 | 89-98 | Direct sisterhood method |
| Central African Republic | 1132 | 89-95 | Direct sisterhood method |
| Chad | 827 | 91-97 | Direct sisterhood method |
| Democratic Republic of the Congo | 1289 | 89-01 | Indirect sisterhood method |
| Gabon | 519 | 94-00 | Direct sisterhood method |
| **Northern Africa** | | | |
| Algeria | 114 | 99-99 | RAMOS |
| Egypt | 84 | 00-00 | RAMOS |
| Libyan Arab Jamahiriya | 77 | 83-95 | Indirect sisterhood method |
| Morocco | 238 | 92-96 | Direct Survey |
| Tunisia | 80 | 00-00 | Cross-sectional |
| **Southern Africa** | | | |
| Namibia | 271 | 91-00 | Direct sisterhood method |
| South Africa | 150 | 92-98 | Direct sisterhood method |
| Swaziland | 194 | 87-94 | Indirect sisterhood method |
| **Western Africa** | | | |
| Benin | 498 | 90-96 | Direct sisterhood method |
| Burkina Faso | 484 | 94-98 | Direct sisterhood method |
| Cape Verde | 127 | 92-93 | RAMOS |
| Guinea | 528 | 92-99 | Direct sisterhood method |
| Guinea-Bissau | 349 | 90-00 | Indirect sisterhood method |
| Mali | 582 | 94-01 | Direct sisterhood method |
| Mauritania | 747 | 94-01 | Direct sisterhood method |
| Nigeria | 289 | 93-99 | Direct sisterhood method |
| Togo | 478 | 93-98 | Direct sisterhood method |

| **Country** | **MMR** | **Period** | **Design** |
| --- | --- | --- | --- |
| **Eastern Asia** | | | |
| Hong Kong* | 2 | 97-99 | Cross-sectional |
| Japan | 7 | 01-01 | Cross-sectional |
| Mongolia | 160 | 00-00 | Cross-sectional |
| Republic of Korea | 20 | 96-96 | RAMOS |
| Taiwan, Province of* | 9 | 98-98 | Cross-sectional |
| **South-Central Asia** | | | |
| Bangladesh | 322 | 98-01 | Direct Survey |
| India | 540 | 97-98 | Direct sisterhood method |
| Iran (Islamic Republic of) | 37 | 96-96 | RAMOS |
| Kazakhstan | 44 | 00-00 | Cross-sectional |
| Kyrgyzstan | 54 | 02-02 | Cross-sectional |
| Nepal | 539 | 90-96 | Direct sisterhood method |
| Pakistan | 533 | 90-91 | Indirect sisterhood method |
| Sri Lanka | 20 | 96-96 | Cross-sectional |
| Tajikistan | 25 | 99-99 | Cross-sectional |
| Turkmenistan | 16 | 98-98 | Cross-sectional |
| Uzbekistan | 35 | 00-00 | Cross-sectional |
| **South-Eastern Asia** | | | |
| Brunei Darussalam | 27 | 00-00 | Cross-sectional |
| Cambodia | 437 | 94-00 | Direct sisterhood method |
| Indonesia | 307 | 98-03 | Direct sisterhood method |
| Lao People's Democratic Republic | 796 | 95-95 | Census |
| Malaysia | 28 | 00-00 | CEMD |
| Myanmar | 255 | 98-99 | Direct Survey |
| Philippines | 172 | 91-97 | Direct sisterhood method |
| Singapore | 11 | 99-01 | Cross-sectional |
| Thailand | 36 | 98-98 | RAMOS |
| Viet Nam | 95 | 99-99 | Cross-sectional |
| **Western Asia** | | | |
| Armenia | 28 | 00-02 | Cross-sectional |
| Azerbaijan | 79 | 90-00 | Indirect sisterhood method |
| Bahrain | 17 | 99-01 | Cross-sectional |
| Georgia | 22 | 98-00 | Cross-sectional |
| Iraq | 294 | 89-99 | Direct sisterhood method |
| Israel | 8 | 97-99 | Cross-sectional |
| Jordan | 40 | 95-96 | RAMOS |
| Kuwait | 6 | 98-00 | Cross-sectional |
| Qatar | 3 | 99-01 | Cross-sectional |
| Saudi Arabia | 23 | 97-98 | RAMOS |
| Yemen | 351 | 88-97 | Direct sisterhood method |

*Not WHO member state, special administrative region of China

| **Country** | **MMR** | **Period** | **Design** |
| --- | --- | --- | --- |
| **Eastern Europe** | | | |
| Belarus | 21 | 00-00 | Cross-sectional |
| Bulgaria | 17 | 02-02 | Cross-sectional |
| Czech Republic | 5 | 99-01 | Cross-sectional |
| Hungary | 8 | 00-02 | Cross-sectional |
| Poland | 4 | 01-01 | Cross-sectional |
| Republic of Moldova | 31 | 02-02 | Cross-sectional |
| Romania | 34 | 01-01 | Cross-sectional |
| Russian Federation | 34 | 02-02 | Cross-sectional |
| Slovakia | 14 | 01-01 | Cross-sectional |
| Ukraine | 24 | 01-01 | Cross-sectional |
| **Northern Europe** | | | |
| Denmark | 6 | 97-99 | Cross-sectional |
| Estonia | 21 | 99-01 | Cross-sectional |
| Finland | 5 | 00-02 | Cross-sectional |
| Iceland | 0 | 93-95 | Cross-sectional |
| Ireland | 4 | 97-99 | Cross-sectional |
| Latvia | 18 | 00-02 | Cross-sectional |
| Lithuania | 14 | 00-02 | Cross-sectional |
| Norway | 6 | 99-01 | Cross-sectional |
| Sweden | 3 | 99-01 | Cross-sectional |
| United Kingdom | 13 | 00-02 | CEMD |
| **Southern Europe** | | | |
| Albania | 8 | 99-01 | Cross-sectional |
| Bosnia and Herzegovina | 16 | 90-91 | Cross-sectional |
| Croatia | 6 | 00-02 | Cross-sectional |
| Greece | 4 | 97-99 | Cross-sectional |
| Italy | 3 | 00-00 | Cross-sectional |
| Malta | 31 | 98-01 | Cross-sectional |
| Portugal | 5 | 98-00 | Cross-sectional |
| Serbia and Montenegro | 10 | 97-99 | Cross-sectional |
| Slovenia | 13 | 99-01 | Cross-sectional |
| Spain | 4 | 00-00 | Cross-sectional |
| TFYR of Macedonia | 8 | 98-00 | Cross-sectional |
| **Western Europe** | | | |
| Austria | 4 | 00-02 | Cross-sectional |
| Belgium | 8 | 95-97 | Cross-sectional |
| France | 7 | 99-99 | Cross-sectional |
| Germany | 4 | 01-01 | Cross-sectional |
| Luxembourg | 6 | 99-01 | Cross-sectional |
| Netherlands | 9 | 00-00 | Cross-sectional |
| Switzerland | 6 | 98-00 | Cross-sectional |

| **Country** | **MMR** | **Period** | **Design** |
| --- | --- | --- | --- |
| **Caribbean** | | | |
| Bahamas | 32 | 93-95 | Cross-sectional |
| Barbados | 28 | 93-95 | Cross-sectional |
| Cuba | 42 | 02-02 | Cross-sectional |
| Dominican Republic | 178 | 92-02 | Direct sisterhood method |
| Haiti | 523 | 94-00 | Direct sisterhood method |
| Jamaica | 64 | 00-00 | Cross-sectional |
| Puerto Rico* | 22 | 92-92 | Cross-sectional |
| Trinidad and Tobago | 57 | 95-97 | Cross-sectional |
| **Central America** | | | |
| Belize | 111 | 94-96 | RAMOS |
| Costa Rica | 16 | 98-98 | Cross-sectional |
| El Salvador | 120 | 88-98 | Indirect sisterhood method |
| Guatemala | 190 | 90-95 | Direct sisterhood method |
| Honduras | 108 | 97-97 | RAMOS |
| Mexico | 64 | 02-02 | Cross-sectional |
| Nicaragua | 156 | 98-98 | Cross-sectional |
| Panama | 61 | 99-99 | Cross-sectional |
| **Southern America** | | | |
| Argentina | 41 | 99-99 | Cross-sectional |
| Bolivia | 230 | 97-03 | Direct sisterhood method |
| Brazil | 161 | 83-96 | Direct sisterhood method |
| Chile | 20 | 98-98 | Cross-sectional |
| Colombia | 35 | 94-94 | Cross-sectional |
| Ecuador | 97 | 01-01 | Cross-sectional |
| Paraguay | 192 | 89-95 | Indirect sisterhood method |
| Peru | 185 | 94-00 | Indirect sisterhood method |
| Suriname | 226 | 91-93 | CEMD |
| Uruguay | 35 | 02-02 | Cross-sectional |
| Venezuela | 67 | 01-01 | Cross-sectional |

*Associated member of WHO

| **Country** | **MMR** | **Period** | **Design** |
| --- | --- | --- | --- |
| **Northern America** | | | |
| Canada | 3 | 00-00 | Cross-sectional |
| United States of America | 9 | 02-02 | Cross-sectional |
| **Oceania** | | | |
| Australia | 4 | 98-00 | Cross-sectional |
| New Zealand | 9 | 00-00 | Cross-sectional |
